# Supplementary material for: The resistomes of six carbapenem-resistant pathogens – a critical genotype–phenotype analysis
Source: PubMed Central journal article supplement (PMC6321870; doi:10.1099/mgen.0.000233), 2018-11-21
Supplement: mgen-4-233-s001.pdf [file mgen-4-233-s001.pdf]

## SUPPLEMENTAL MATERIAL

**Table S1** Isolation data

| Species                        | Strain     | Isolation site | Treatment <sup>†</sup> | Treated abroad <sup>†</sup> |
|--------------------------------|------------|----------------|------------------------|-----------------------------|
| <i>Pseudomonas aeruginosa</i>  | CCUG 70744 | Sputum         | Meropenem              | -                           |
| <i>Escherichia coli</i>        | CCUG 70745 | Rectum         | -                      | -                           |
| <i>Klebsiella pneumoniae</i>   | CCUG 70742 | Urine          | -                      | -                           |
| <i>Proteus mirabilis</i>       | CCUG 70746 | Rectum         | -                      | Balkan                      |
| <i>Acinetobacter baumannii</i> | CCUG 70743 | Wound          | -                      | Middle east                 |
| <i>Klebsiella pneumoniae</i>   | CCUG 70747 | Wound          | Cefotaxime             | Balkan                      |

<sup>†</sup> No information marked with dash (-).

**Table S2** Intrinsic resistance genes in the reference genomes excluded from further analysis

| Strain                         | Gene                             | Function                          | Accession number |
|--------------------------------|----------------------------------|-----------------------------------|------------------|
| <i>P. aeruginosa</i> PAO1      | <i>aph(3')-IIb</i>               | Aminoglycoside phosphotransferase | X90856           |
|                                | <i>bla<sub>OXA-50-like</sub></i> | β-lactamase                       | AY306130         |
|                                | <i>bla<sub>PAO</sub></i>         | β-lactamase                       | FJ666065         |
|                                | <i>catB7</i>                     | Chloramphenicol acetyltransferase | AF036933         |
|                                | <i>fosA</i>                      | Enzymatic fosfomycin resistance   | NZ_ACWU01000146  |
| <i>K. pneumoniae</i> MGH 78578 | <i>bla<sub>SHV-11</sub></i>      | β-lactamase                       | EF035558         |
|                                | <i>fosA</i>                      | Enzymatic fosfomycin resistance   | NZ_AFBO01000747  |
|                                | <i>oqxAB</i>                     | Quinolone efflux pump             | EU370913         |
| <i>P. mirabilis</i> HI4320     | <i>cat</i>                       | Chloramphenicol acetyltransferase | M11587           |
|                                | <i>tet(I)</i>                    | Tetracycline efflux pump          | ACLE01000065     |
| <i>A. baumannii</i> ATCC 17978 | <i>bla<sub>ADC-25</sub></i>      | β-lactamase                       | EF016355         |
|                                | <i>bla<sub>OXA-66</sub></i>      | β-lactamase                       | FJ360530         |

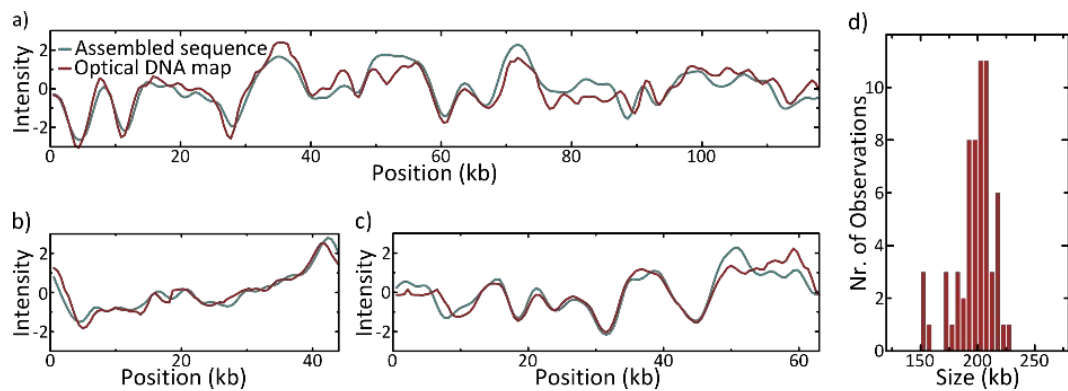

**Fig. S1** Comparison between experimentally generated optical DNA maps (red) and theoretical optical DNA maps based on assembled sequences (teal) for non-novel plasmids **(a)** pKpn70747\_2 in *K. pneumoniae* CCUG 70747 (118 kb), **(b)** pEco70745\_2 in *E. coli* CCUG 70745 (44 kb), and **(c)** pKpn70742\_2 in *K. pneumoniae* CCUG 70742 (63 kb). Intensity (y-axis) refers to the normalized emission intensity along the DNA molecule (x-axis) which correlates coarsely with the underlying DNA sequence. **(d)** Histogram displaying the size distribution of individual plasmid molecules found in *P. mirabilis* CCUG 70746, demonstrating a high variability of the plasmid within the sample.

**Table S3** Chromosomal genes screened for mutations conferring resistance

| Reference strain                           | Function                      | Gene              | Locus tag       |
|--------------------------------------------|-------------------------------|-------------------|-----------------|
| <i>P. aeruginosa</i><br>PAO1               | Quinolone targets             | <i>gyrA</i>       | PA3168          |
|                                            |                               | <i>gyrB</i>       | PA0004          |
|                                            |                               | <i>parC</i>       | PA4964          |
|                                            |                               | <i>parE</i>       | PA4967          |
|                                            | β-lactamase                   | <i>ampC</i>       | PA4110          |
|                                            | Penicillin-binding protein    | <i>dacB</i>       | PA3047          |
|                                            |                               | <i>dacC</i>       | PA3999          |
|                                            |                               | <i>ftsI</i>       | PA4418          |
|                                            |                               | <i>mrcB</i>       | PA4700          |
|                                            |                               | <i>pbpA</i>       | PA4003          |
|                                            |                               | <i>pbpC</i>       | PA2272          |
|                                            |                               | <i>pbpG</i>       | PA0869          |
|                                            | Drug efflux pumps             | <i>ponA</i>       | PA5045          |
|                                            |                               | <i>mexA</i>       | PA0425          |
|                                            |                               | <i>mexB</i>       | PA0426          |
|                                            |                               | <i>mexC</i>       | PA4599          |
|                                            |                               | <i>mexD</i>       | PA4598          |
|                                            |                               | <i>mexE</i>       | PA2493          |
|                                            |                               | <i>mexF</i>       | PA2494          |
|                                            |                               | <i>mexX</i>       | PA2019          |
|                                            |                               | <i>mexY</i>       | PA2018          |
|                                            |                               | <i>oprJ</i>       | PA4597          |
|                                            |                               | <i>oprM</i>       | PA0427          |
|                                            | Porin                         | <i>oprN</i>       | PA2495          |
|                                            |                               | <i>oprD</i>       | PA0958          |
|                                            | Regulatory proteins           | <i>ampD</i>       | PA4522          |
|                                            |                               | <i>ampR</i>       | PA4109          |
| <i>czcR</i>                                |                               | PA2523            |                 |
| <i>czcS</i>                                |                               | PA2524            |                 |
| <i>mexR</i>                                |                               | PA0424            |                 |
| <i>mexT</i>                                |                               | PA2492            |                 |
| <i>mexZ</i>                                |                               | PA2020            |                 |
| <i>nalC</i>                                |                               | PA3721            |                 |
| <i>nalD</i>                                |                               | PA3574            |                 |
| <i>nfxB</i>                                |                               | PA4600            |                 |
| <i>E. coli</i> str. K-12<br>substr. MG1655 | Quinolone targets             | <i>gyrA</i>       | b2231           |
|                                            |                               | <i>gyrB</i>       | b3699           |
|                                            |                               | <i>parC</i>       | b3019           |
|                                            |                               | <i>parE</i>       | b3030           |
| <i>K. pneumoniae</i><br>MGH 78578          | Quinolone targets             | <i>gyrA</i>       | KPN_02640       |
|                                            |                               | <i>gyrB</i>       | KPN_03437       |
|                                            |                               | <i>parC</i>       | KPN_03444       |
|                                            |                               | <i>parE</i>       | KPN_04102       |
|                                            | Drug efflux pumps             | <i>acrA</i>       | KPN_00444       |
|                                            |                               | <i>acrB</i>       | KPN_00443       |
|                                            | Regulatory proteins           | <i>acrR</i>       | KPN_00445       |
|                                            |                               | <i>marA</i>       | KPN_01624       |
|                                            |                               | <i>marR</i>       | KPN_01625       |
|                                            |                               | <i>ramA</i>       | KPN_00556       |
|                                            |                               | <i>ramR</i>       | KPN_00555       |
|                                            |                               | <i>soxR</i>       | KPN_04463       |
|                                            |                               | <i>soxS</i>       | KPN_04462       |
|                                            | Outer membrane protein        | <i>tolC</i>       | KPN_03449       |
|                                            | <i>P. mirabilis</i><br>HI4320 | Quinolone targets | <i>gyrA</i>     |
| <i>gyrB</i>                                |                               |                   | HMPREF0693_0114 |
| <i>parC</i>                                |                               |                   | HMPREF0693_2557 |
| <i>parE</i>                                |                               |                   | HMPREF0693_2558 |
| <i>A. baumannii</i><br>ATCC 17978          | Quinolone targets             | <i>gyrA</i>       | A1S_2626        |
|                                            |                               | <i>gyrB</i>       | A1S_0004        |
|                                            |                               | <i>parC</i>       | A1S_0194        |
|                                            |                               | <i>parE</i>       | A1S_3359        |

**Table S4** MICs and EUCAST clinical resistance classifications

| Antibiotic class | Antibiotic                    | <i>P. aeruginosa</i> |    | <i>E. coli</i> |   | <i>K. pneumoniae</i> |    | <i>P. mirabilis</i> |    | <i>A. baumannii</i> |    | <i>K. pneumoniae</i> |    |
|------------------|-------------------------------|----------------------|----|----------------|---|----------------------|----|---------------------|----|---------------------|----|----------------------|----|
|                  |                               | CCUG 70744*          |    | CCUG 70745*    |   | CCUG 70742*          |    | CCUG 70746*         |    | CCUG 70743*         |    | CCUG 70747*          |    |
| Carbapenems      | Ertapenem                     | >32                  | iR | >32            | R | 4                    | R  | >32                 | R  | >32                 | iR | >32                  | R  |
|                  | Imipenem                      | >32                  | R  | >32            | R | 0.5                  | S  | >32                 | R  | >32                 | R  | >32                  | R  |
|                  | Meropenem                     | >32                  | R  | >32            | R | 0.5                  | S  | 32                  | R  | >32                 | R  | >32                  | R  |
| Cephalosporins   | Cefuroxime                    | >256                 | iR | >256           | R | >256                 | R  | >256                | R  | >256                | iR | >256                 | R  |
|                  | Cefotaxime                    | >32                  | iR | >32            | R | >32                  | R  | >32                 | R  | >32                 | iR | >256                 | R  |
|                  | Ceftazidime                   | 256                  | R  | >256           | R | 32                   | R  | >256                | R  | >256                | -  | >256                 | R  |
|                  | Ceftriaxone                   | >32                  | iR | >32            | R | >32                  | R  | >32                 | R  | >32                 | iR | >32                  | R  |
| Monobactams      | Aztreonam                     | 96                   | R  | >256           | R | 64                   | R  | 2                   | I  | >256                | -  | >256                 | R  |
| Penicillins      | Amoxicillin                   | >256                 | iR | >256           | R | >256                 | R  | >256                | R  | >256                | iR | >256                 | R  |
|                  | Ampicillin                    | >256                 | iR | >256           | R | >256                 | iR | >256                | R  | >256                | iR | >256                 | iR |
|                  | Amoxicillin/clavulanic acid   | >256/2               | iR | >256/2         | R | >256/2               | R  | >256/2              | R  | >256/2              | iR | >256/2               | R  |
|                  | Piperacillin/Tazobactam       | >256/4               | R  | >256/4         | R | 256/4                | R  | 32/4                | R  | >256/4              | -  | >256/4               | R  |
| Aminoglycosides  | Amikacin                      | 16                   | I  | 16             | I | 6                    | S  | >256                | R  | 64                  | R  | 32                   | R  |
|                  | Gentamicin                    | 4                    | S  | 1              | S | 2                    | S  | >256                | R  | 64                  | R  | 2                    | S  |
|                  | Tobramycin                    | 1                    | S  | 16             | R | 16                   | R  | >256                | R  | 64                  | R  | 16                   | R  |
| Fluoroquinolones | Ciprofloxacin                 | 1                    | I  | >32            | R | >32                  | R  | >32                 | R  | >32                 | R  | >32                  | R  |
|                  | Levofloxacin                  | 8                    | R  | >32            | R | 2                    | I  | 32                  | R  | >32                 | R  | 32                   | R  |
|                  | Moxifloxacin                  | 8                    | R  | >32            | R | 4                    | R  | 32                  | R  | >32                 | -  | >32                  | R  |
| Sulfonamides     | Trimethoprim/sulfamethoxazole | >32/608              | iR | >32/608        | R | >32/608              | R  | >32/608             | R  | >32/608             | R  | >32/608              | R  |
| Tetracyclines    | Tetracycline                  | 64                   | iR | >256           | R | 192                  | R  | 32                  | iR | >256                | -  | 4                    | R  |
|                  | Tigecycline                   | 16                   | iR | 1              | S | 4                    | R  | 32                  | R  | 8                   | -  | 1                    | S  |
| Others           | Colistin                      | 0.5                  | S  | 0.25           | S | 2                    | S  | >256                | iR | 1                   | S  | 2                    | S  |
|                  | Fosfomycin                    | >256                 | -  | 0.25           | S | 32                   | S  | 8                   | S  | 1024                | iR | 64                   | R  |
|                  | Chloramphenicol               | >256                 | iR | 64             | R | 4                    | S  | 256                 | R  | >256                | -  | 16                   | R  |

\*S = susceptible, I = intermediate, R = resistant, iR = intrinsically resistant. Units are mg l<sup>-1</sup>.

**Table S5.** Closest matching plasmids

| Strain                             | Plasmid     | Length (bp) | Closest match in GenBank                                                                                | Length (bp) | Accession number | Isolation county | Alignment identity | Gaps | Same ARGs* |
|------------------------------------|-------------|-------------|---------------------------------------------------------------------------------------------------------|-------------|------------------|------------------|--------------------|------|------------|
| <i>E. coli</i><br>CCUG 70745       | pEco70745_1 | 107 323     | <i>Escherichia coli</i> isolate Co6114 plasmid pC06114_1                                                | 129 085     | CP016035.1       | Germany          | 67 %               | 19 % | No         |
|                                    | pEco70745_2 | 44 006      | <i>Escherichia coli</i> strain OM26 plasmid pOM26-1                                                     | 45 122      | KP776609.1       | Oman             | 98 %               | 3 %  | Yes        |
|                                    | pEco70745_3 | 3 608       | <i>Salmonella enterica</i> subsp. enterica serovar Typhimurium var. 5- str. CFSAN001921 plasmid unnamed | 3 609       | CP006052.1       | USA              | 98 %               | 0 %  | -          |
|                                    | pEco70745_4 | 1 934       | <i>Escherichia coli</i> strain G3/10 plasmid pSYM3                                                      | 1 934       | KM107839.1       | Germany          | 100 %              | 0 %  | -          |
|                                    | pEco70745_5 | 1 780       | <i>Escherichia coli</i> strain EC08 plasmid pEC08-1 RepA gene                                           | 1 980       | JX238440.1       | Sweden           | 93 %               | 0 %  | -          |
|                                    | pEco70745_6 | 1 459       | <i>Escherichia coli</i> strain ST648 plasmid pEC648_7                                                   | 1 459       | CP008721.1       | China            | 100 %              | 0 %  | -          |
| <i>K. pneumoniae</i><br>CCUG 70742 | pKpn70742_1 | 65 276      | <i>Klebsiella pneumoniae</i> strain ATCC BAA-2146 plasmid pHg                                           | 85 161      | CP006662.2       | USA              | 67 %               | 26 % | No         |
|                                    | pKpn70742_2 | 63 075      | <i>Enterobacter cloacae</i> strain INSRA17313-1 plasmid pUR17313-1                                      | 63 584      | KP061858.1       | Portugal         | 97 %               | 3 %  | Yes        |
|                                    | pKpn70742_3 | 4 426       | <i>Klebsiella pneumoniae</i> strain 0773 plasmid pKpn114, complete sequence                             | 4 211       | EU932690.1       | China            | 96 %               | 7 %  | -          |
|                                    | pKpn70742_4 | 1 780       | <i>Escherichia coli</i> strain EC08 plasmid pEC08-1 RepA gene                                           | 1 780       | JX238440.1       | Sweden           | 93 %               | 0 %  | -          |
| <i>P. mirabilis</i><br>CCUG 707466 | pPmi70746_1 | 191 769     | <i>Salmonella enterica</i> subsp. enterica serovar Corvallis plasmid pRH-1238                           | 187 683     | KR091911.1       | Germany          | 78 %               | 20 % | No         |
| <i>A. baumannii</i><br>CCUG 70743  | pAba70743_1 | 10 880      | <i>Acinetobacter baumannii</i> plasmid pAB120                                                           | 10 879      | JX069966.1       | Lithuania        | 100 %              | 0 %  | Yes        |
| <i>K. pneumoniae</i><br>CCUG 70747 | pKpn70747_1 | 186 310     | <i>Klebsiella pneumoniae</i> JM45 plasmid p1                                                            | 317 154     | CP006657.1       | China            | 52 %               | 41 % | No         |
|                                    | pKpn70747_2 | 117 859     | <i>Klebsiella pneumoniae</i> strain Kpn-1870 plasmid pGR-1870                                           | 116 047     | KF874498.1       | Greece           | 89 %               | 7 %  | Yes        |
|                                    | pKpn70747_3 | 32 773      | <i>Salmonella enterica</i> subsp. enterica serovar Typhi linear plasmid pBSSB1                          | 27 037      | AM419040.1       | Indonesia        | 73 %               | 21 % | -          |

\* Antibiotic resistance genes (ARGs).

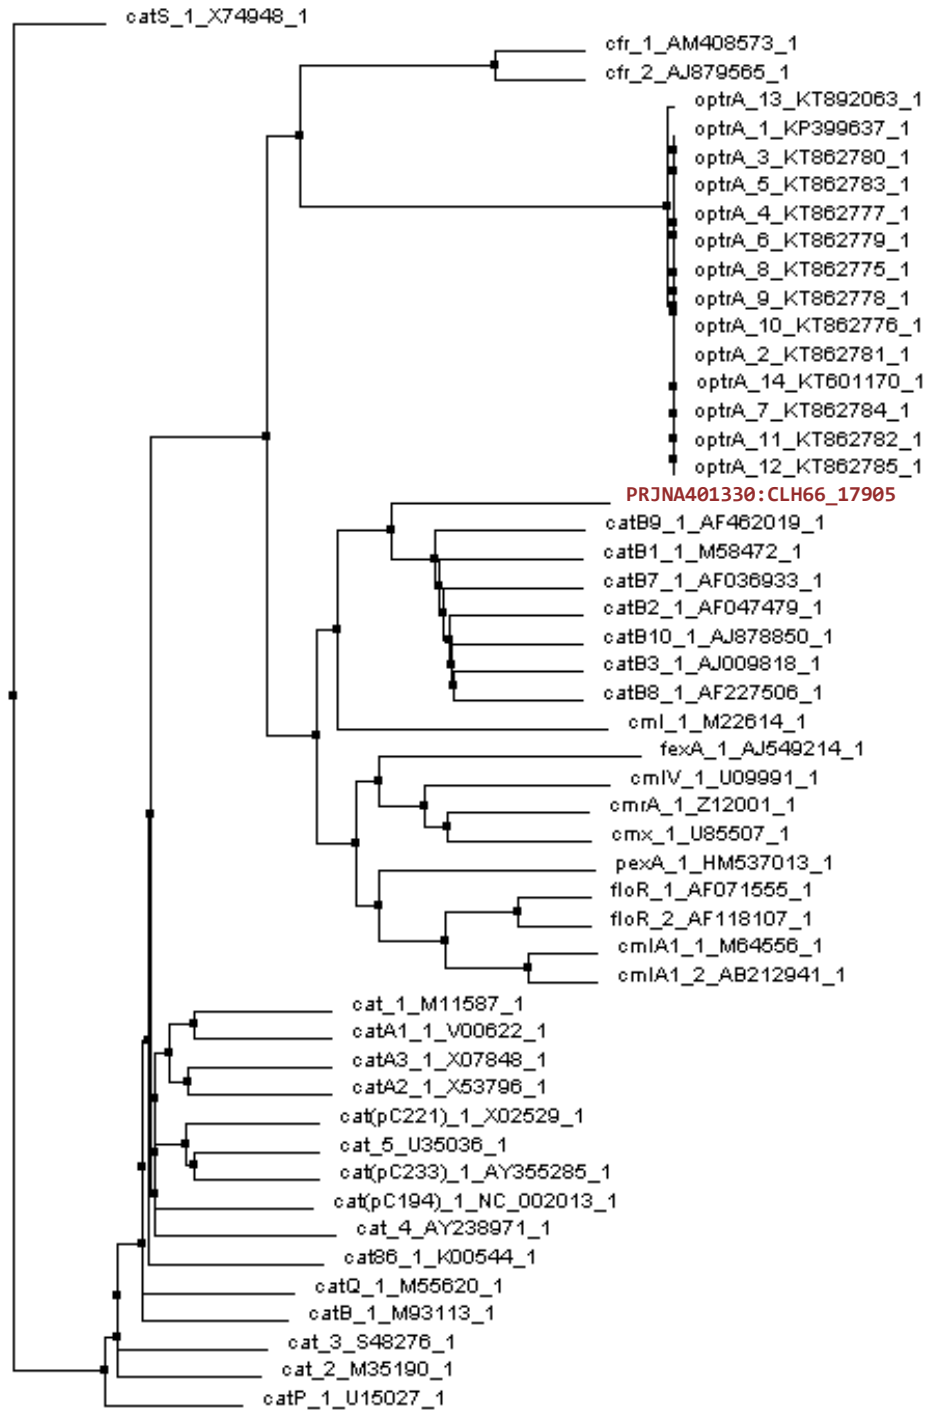

**Fig. S2 (a)** Multiple sequence alignment of all phenicol resistance proteins in the ResFinder database and the *cat*-like protein encoded by the chromosome of *E. coli* CCUG 70745. The putative phenicol resistance gene (protein id PRJNA401330:CLH66\_17905) is most similar to the group of CatB enzymes. The alignment was done using Clustal Omega and the figure depicts a neighbour joining tree using the BLOSUM62 distance matrix.

```

> PRJNA401330:CLH66_17905
MKIMKINNIDVMKENDIVFSNTAGFWSGPVEIECPAEIRQGVYQVDKIGAF
SYMGGKSTHMLHIESIGRFCAIAGNVVAGAMEHPAHLSPHPIMQGVFKWK
ALDDFKLKNKMDLWKSRTFNNQINKDRFGKIKIGNDVWIGEGAFIRRGVKI
GDGAIASHSVSKDVAPYSIVGGVPAKHIFRFEDNIEQLIEIKWWDYG
LSALEGVDFTDINKAIKKIRENIDSGVAEKFTPNVIRINKDGVAEKI*

```

**Fig. S2 (b)** The predicted protein sequence of the putative novel phenicol inactivating enzyme in *E. coli* CCUG 70745 .

|             |     |                                                           |     |
|-------------|-----|-----------------------------------------------------------|-----|
| AF462019_1  | 1   | MNFFTSPFSGIPLDQVTPNPIIVGKHSYSGYYHGHSFDDCVRYLHPER          | 50  |
|             |     | ... ..:  . ... .   . ... : ... ...: ...:....              |     |
| CLH66_17905 | 1   | MKIM--KINNI----DVMKENDIV--FSNTAGFWSGPVEIECPAEIRQGV        | 42  |
| AF462019_1  | 51  | DDVDKL-----VIGSFCSIGSGAVFMMAGNQGHRSDWI                    | 83  |
|             |     | ..   : .  .  : ...    ... ...:                            |     |
| CLH66_17905 | 43  | <u>YQVDKIGAFSYMGGKSTHMLHIESIGRFCAIAGNVV--AGAMEHPAHL</u>   | 89  |
| AF462019_1  | 84  | STFP-----FFYQDNDNFA-DARDGFTRS-----GDTIIGHDV               | 115 |
|             |     | ..   ...: : ... ...:   ... : :                            |     |
| CLH66_17905 | 90  | <u>SPHPIMQGVFKWKALDDFKLKNKMDLWKSRTFNNQINKDRFGKIKIGNDV</u> | 139 |
| AF462019_1  | 116 | WIGTEAMIMPVKIGHGAIASRSVTKDVAPYEVVGSNPAKHIFRFSD            | 165 |
|             |     | .. . .   ... ... ... ... ... ... ... ... ... ...          |     |
| CLH66_17905 | 140 | <u>WIGEGAFIRRGVKIGDGAIASHSVSKDVAPYSIVGGVPAKHIFRFED</u>    | 189 |
| AF462019_1  | 166 | VEIAMLLEMAWNNWPESWL-----KESMQSLCSDSIEG-----               | 198 |
|             |     | .. . . : : ...: ...   ...: ... .                          |     |
| CLH66_17905 | 190 | <u>NIEQLIEIKWWDYGLSALEGVDFTDINKAIKKIRENIDSGVAEKFTPNV</u>  | 239 |
| AF462019_1  | 199 | LYLNWQSKART- 209                                          |     |
|             |     | :: ... ..                                                 |     |
| CLH66_17905 | 240 | IRINKDGVAEKI 251                                          |     |

**Fig. S2 (c)** A global protein alignment between the putative novel phenicol inactivating enzyme in *E. coli* CCUG 70745 (PRJNA401330:CLH66\_17905) and the closest match in ResFinder, CatB9 (accession number AF62019) with 31.6% alignment identity, 42.6% similarity, and 24.7% gaps. Underlined region corresponds to the match against the conserved domain “Zenobiotic acyltransferase (XAT)” (see FIG. S2d).

|             |     |                                                                                        |     |     |     |     |     |     |    |  |
|-------------|-----|----------------------------------------------------------------------------------------|-----|-----|-----|-----|-----|-----|----|--|
|             |     | 10                                                                                     | 20  | 30  | 40  | 50  | 60  | 70  | 80 |  |
|             |     | ...*... ...*... ...*... ...*... ...*... ...*... ...*... ...*...                        |     |     |     |     |     |     |    |  |
| CLH66_17905 | 48  | <u>IGAFSYMGGKSTHMLHI-ESIGRFCAIAGNVVAGA-MEHPAHFLSPHPIMQGVFKWKALDDFKlknkDMLWksrtfnqi</u> | 125 |     |     |     |     |     |    |  |
| Cdd:cd03349 | 4   | <u>VGDYSYSGPDCDVGdKLSIGKFCISIApGVKIGlgNHPDtwvSTYPFYIFGGEWEDDAKFD----</u>               | 71  |     |     |     |     |     |    |  |
|             |     | 90                                                                                     | 100 | 110 | 120 | 130 | 140 | 150 |    |  |
|             |     | ...*... ...*... ...*... ...*... ...*... ...*... ...*... ...*...                        |     |     |     |     |     |     |    |  |
| CLH66_17905 | 126 | <u>nkdrfGKIKIGNDVWIGEGAFIRRGVKIGDGAIASHSVSKDVAPYSIVGGVPAKHIFRFEDNIEQLIEIKWWDY</u>      | 203 |     |     |     |     |     |    |  |
| Cdd:cd03349 | 72  | <u>-----GDVIIGNDVWIGGATILpGVtIGDGAIVAGAVTKDVPYAIvGGNPAKVIRYRFDEETIERLLALKWWDW</u>      | 144 |     |     |     |     |     |    |  |

**FIG. S2 (d)** Local alignment between the putative novel phenicol inactivating enzyme in *E. coli* CCUG 70745 (PRJNA401330:CLH66\_17905) and the closest matching domain in the Conserved Domains Database (CDD): Zenobiotic acyltransferase (XAT) (Accession: cd03349; pssm-ID: 100040; domain length: 145; e-value: 6.30e-54). “The XAT class of hexapeptide acyltransferases is composed of a large number of microbial enzymes that catalyze the CoA-dependent acetylation of a variety of hydroxyl-bearing acceptors such as chloramphenicol and streptogramin, among others.”
